# Supplementary material
Source: Springer Nature journal article supplement (https://www.springermedizin.de/resource/supplementary/12913_2013_3765_MOESM4_ESM.pdf/9533286)

**General contextual factors**

*Hospital policy  
Interdisciplinary policy-making  
Team relationships  
Attitudes of leaders*

**Individual factors**

*Satisfaction with the job  
Responsibility toward patients  
Roles as professionals  
Confidence and previous experiences  
Communication skills  
Educational background*

**Perceived safety versus “costs”, such as:**

*Fear of the responses of others / conflict  
Concerns of appearing incompetent*

**Perceived efficacy versus futility**

*Lack of change  
Personal control and impact*

**Outcomes for the patient**

*Error correction*

**Motive to help patient**

*Harm rating  
Clinical situation*

**Voice: message, tactics, targets**

*Collect facts  
Show positive intent  
Select person*

**Outcomes for the messenger and others involved**

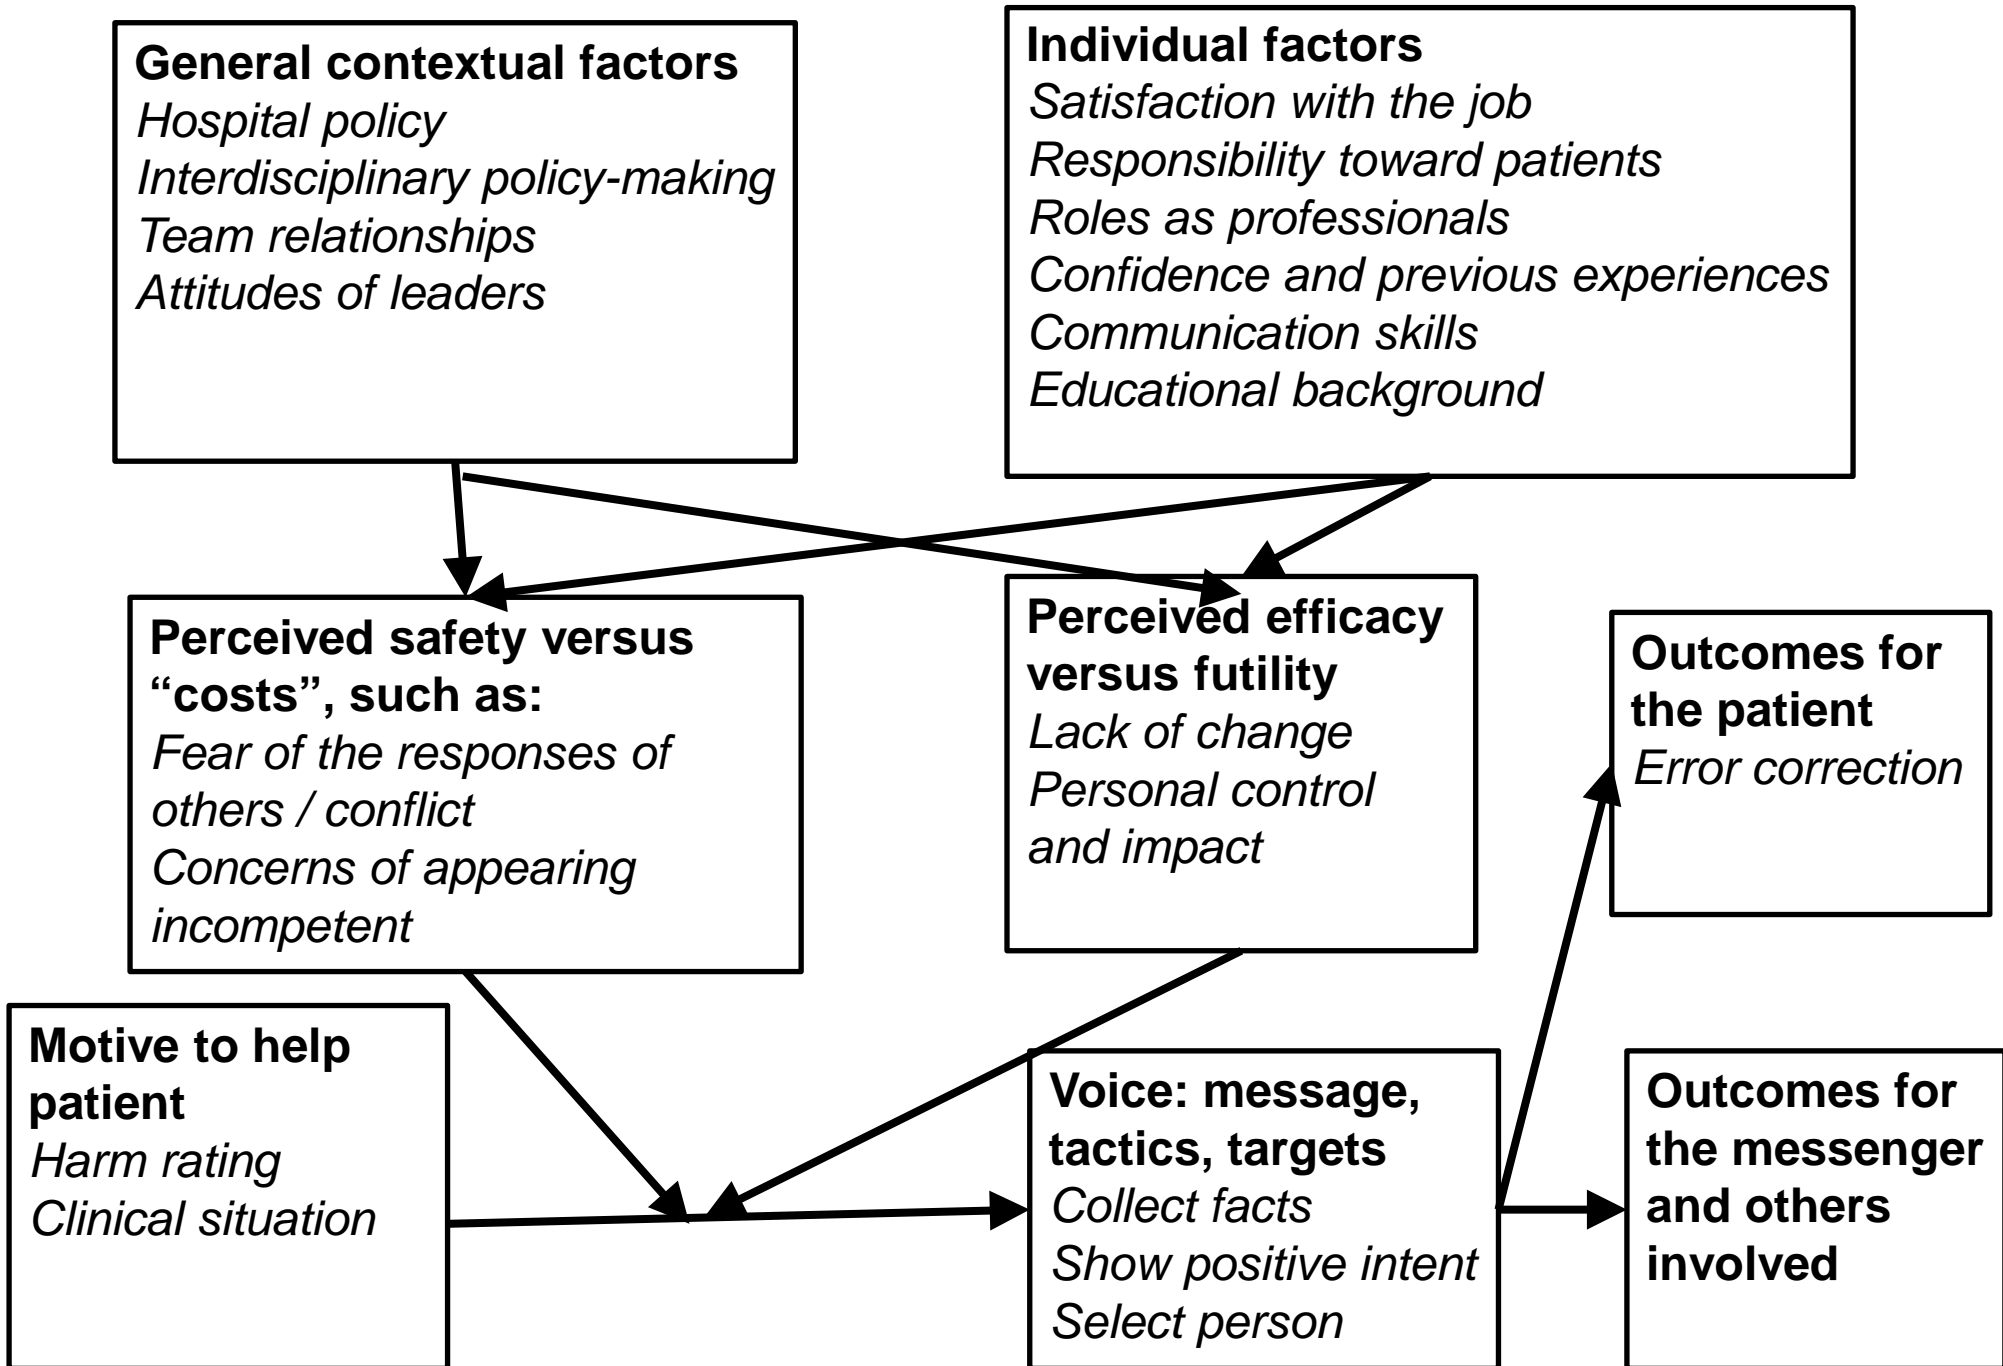

Supplement: MOESM4 [file 9533286]
